# Supplementary material
Source: PubMed Central journal article supplement (PMC5948177)
Supplement: NIHMS961205-supplement-Supplement.pdf [file NIHMS961205-supplement-Supplement.pdf]

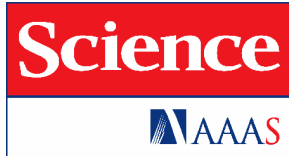

## Supplementary Materials for

### **High-resolution cryo-EM analysis of the yeast ATP synthase in a lipid membrane**

Anurag P. Srivastava,\* Min Luo,\* Wenchang Zhou, Jindrich Symersky, Dongyang Bai, Melissa G. Chambers, José D. Faraldo-Gómez, Maofu Liao,† David M. Mueller†

\*These authors contributed equally to this work.

†Corresponding author. Email: david.mueller@rosalindfranklin.edu (D.M.M.); maofu\_liao@hms.harvard.edu (M.L.)

Published 12 April 2018 on *Science* First Release  
DOI: 10.1126/science.aas9699

#### **This PDF file includes:**

Supplementary Text  
Figs. S1 to S12  
References

## Supplementary Text

**Choosing Nanodisks For This Study.** We chose to use nanodisks over detergent for a number of reasons. First, we knew that many groups were working on the structure of the ATP synthase by cryo EM and that they were having difficulties in improving the resolution of the structure. We chose not to follow the same protocol that others were using realizing that we might encounter the same issues. Dr. Liao used nanodisks successfully for the structure determination of other membrane proteins and thus, this experience motivated us to chose nanodisks over detergent. Second, in principle, the enzyme incorporated into nanodisks is more native than detergents. This may be the reason why we see Glu59 in an “open” conformation while it is “closed” in detergent. (The “open” conformation we saw in our studies with the yeast  $c_{10}$ -ring was under detergent free conditions as well. We were never able to convert the side chains from open to closed further suggesting that the “open” conformation is not allowed under a number of conditions.) Third, we were interested in obtaining structures of inhibitors bound to the enzyme and recognized that the inhibitors bound to the surface of the  $c_{10}$ -ring. If we wanted to mimic the structure of the inhibitor binding in the native membrane, then nanodisks was the preferred system. However, the cryo density associated with the lipids can create a surface density which can make it more difficult to view ligands that bind to the lipid exposed surface of the protein – in this case, oligomycin. Notwithstanding this, we chose nanodisks over detergent for the our studies.

**Fig. S1. Composite images of the yeast  $F_1F_0$  ATP synthase used in this study. A.** Schematic of the design of the fusion construct. **B.** Polypeptide composition of the ATP synthase from wild type (wt) yeast and the strain containing the fusion construct of subunits F6 and  $\delta$ .

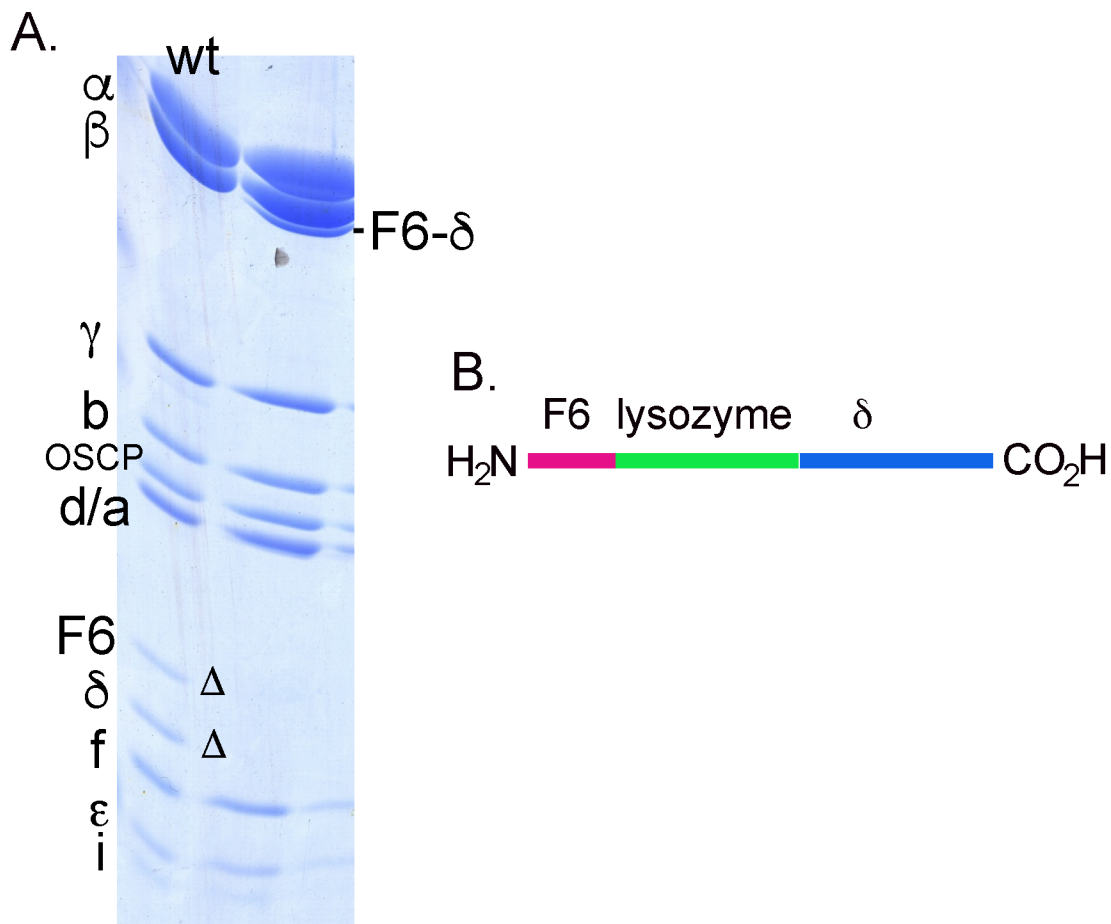

**Fig. S2. Single-particle cryo-EM analysis of ATP synthase in nanodiscs.** **A.** Representative cryo-EM image with several particles marked by circles. **B.** 2D averages of cryo-EM particles. The box dimension is 394 Å. **C.** Image processing workflow. The density of lysozyme (“LZ”) is clearly shown in the 3D reconstruction of one 3D class. The final  $F_1F_0$  and  $F_0$  maps with their overall resolutions are indicated in red boxes.

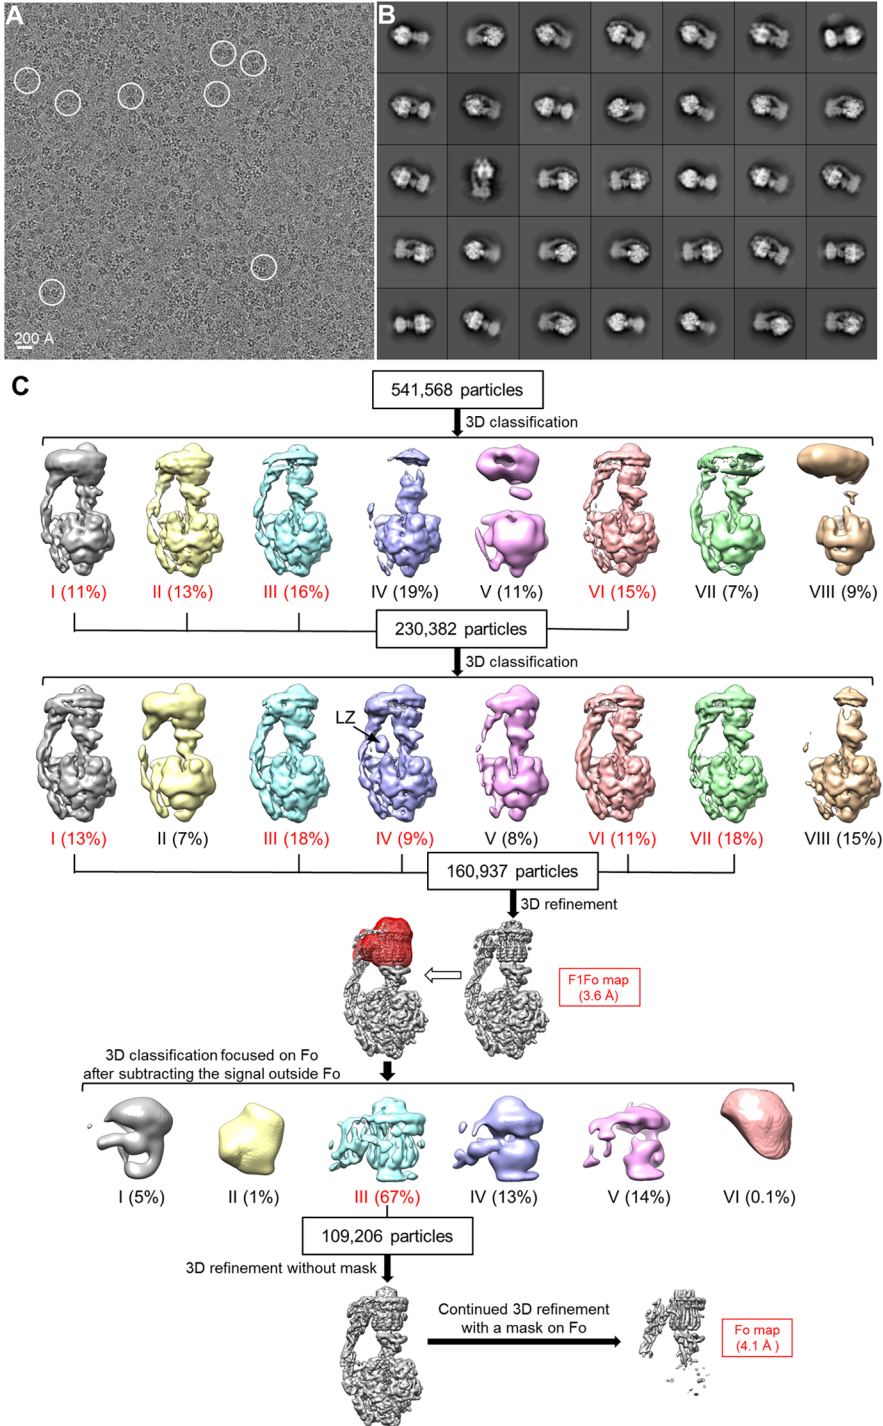

**Fig. S3. Single-particle cryo-EM analysis of ATP synthase in nanodiscs with oligomycin. a,** Representative cryo-EM image with several particles marked by circles. **b,** 2D averages of cryo-EM particles. The box dimension is 394 Å. **c,** Image processing workflow. The final  $F_1F_0$  and  $F_0$  maps with their overall resolutions are indicated in red boxes.

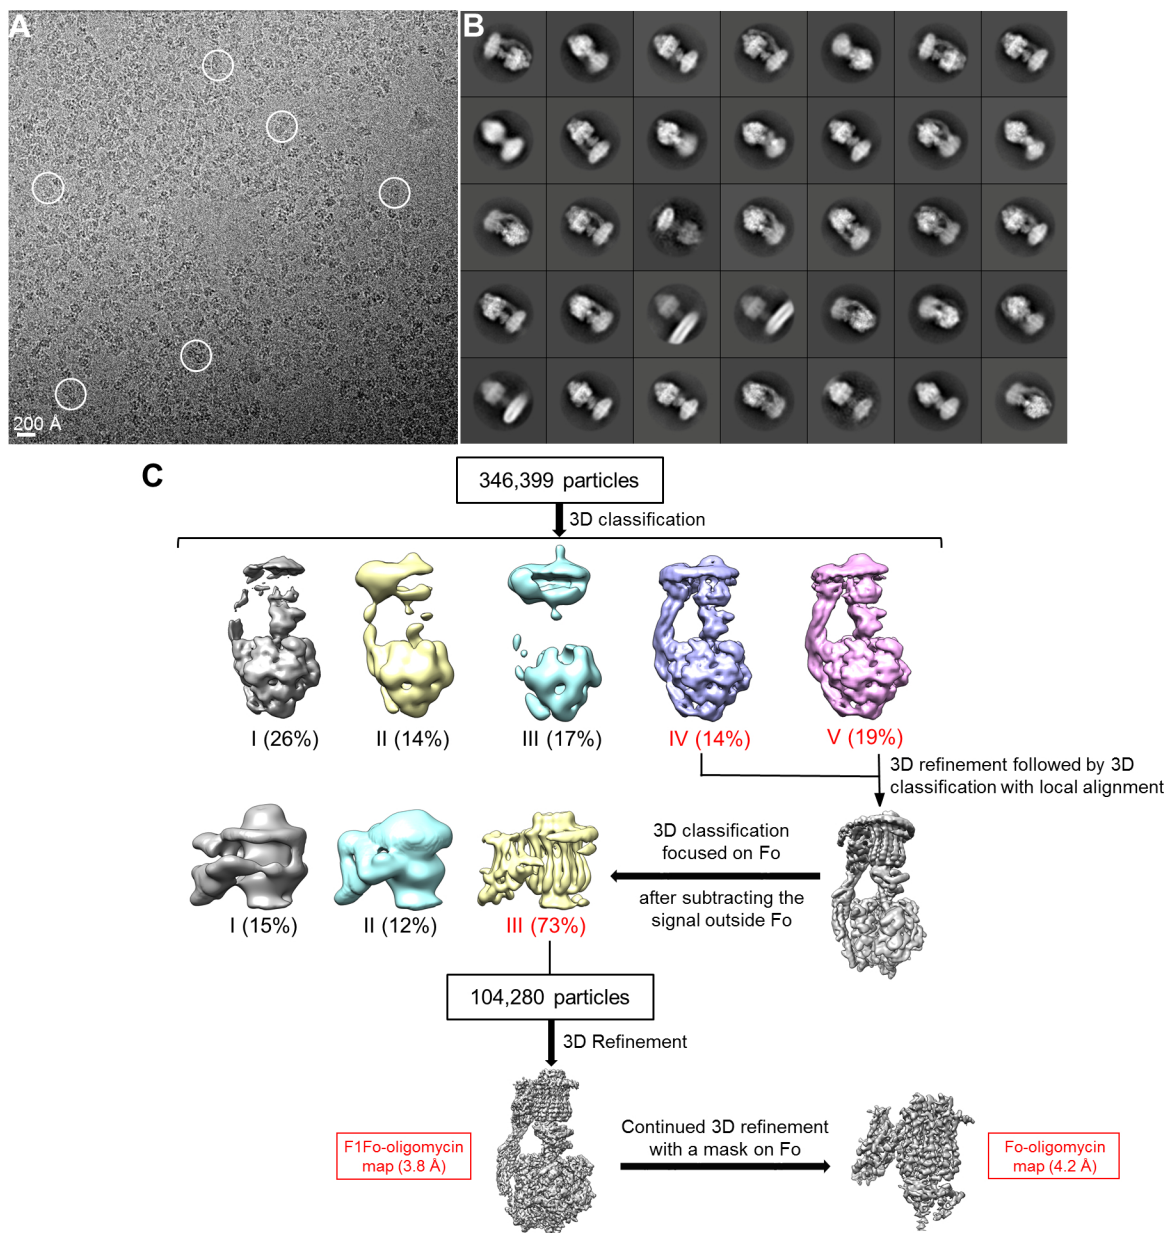



**Fig. S5. Examples of the fit of the models and the cryo-EM maps.**

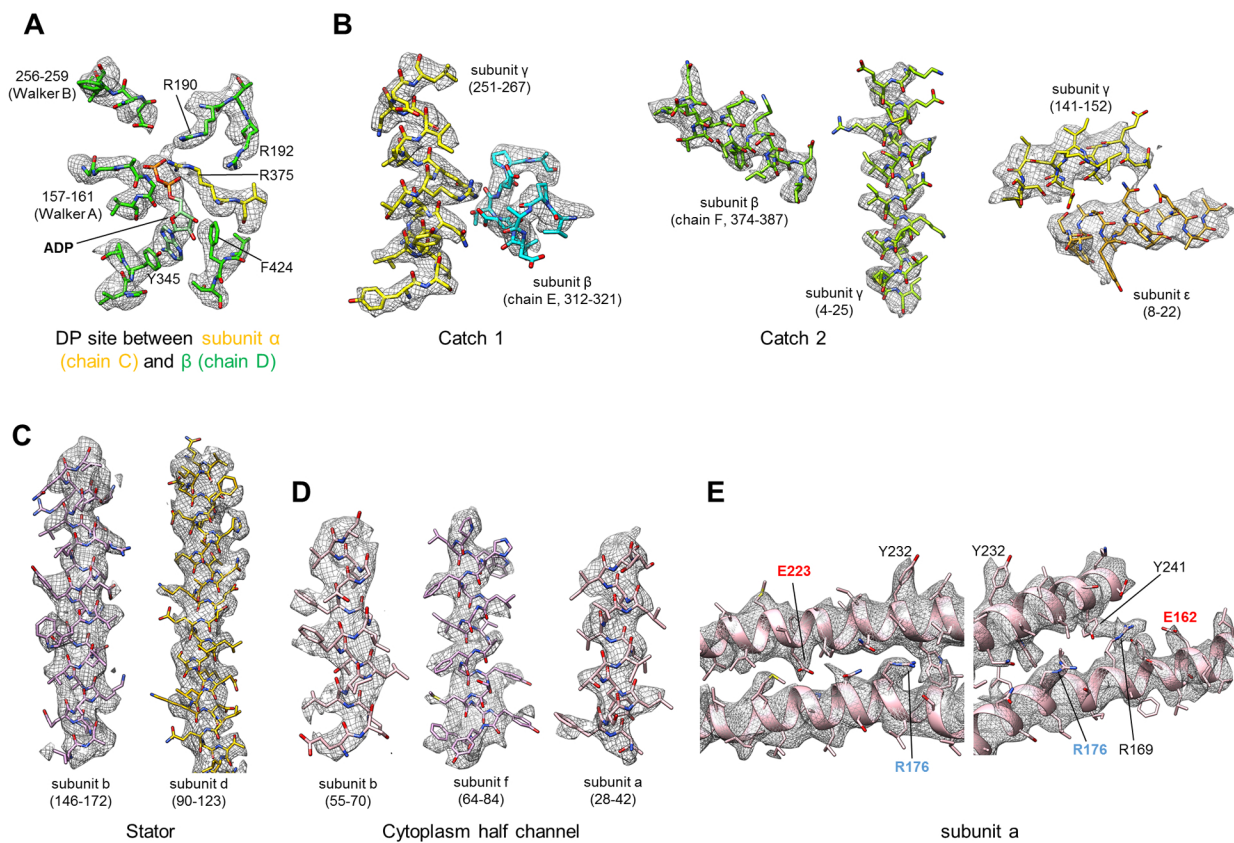

**Fig. S6. EM density and atomic model of  $c_{10}$ -ring.** **A.** Cross-sectional view of the final  $F_0$  map at the level of Glu59 residues in subunit c (left) and side views of the EM density of four c subunits superimposed on the atomic model (right). The cross section is parallel to the membrane plane and viewed from the side of the intermembrane space. The subunits a and c are colored yellow and green, and the ten c subunits are numbered. **B.** same as **A**, except for the final  $F_0$  map with oligomycin.

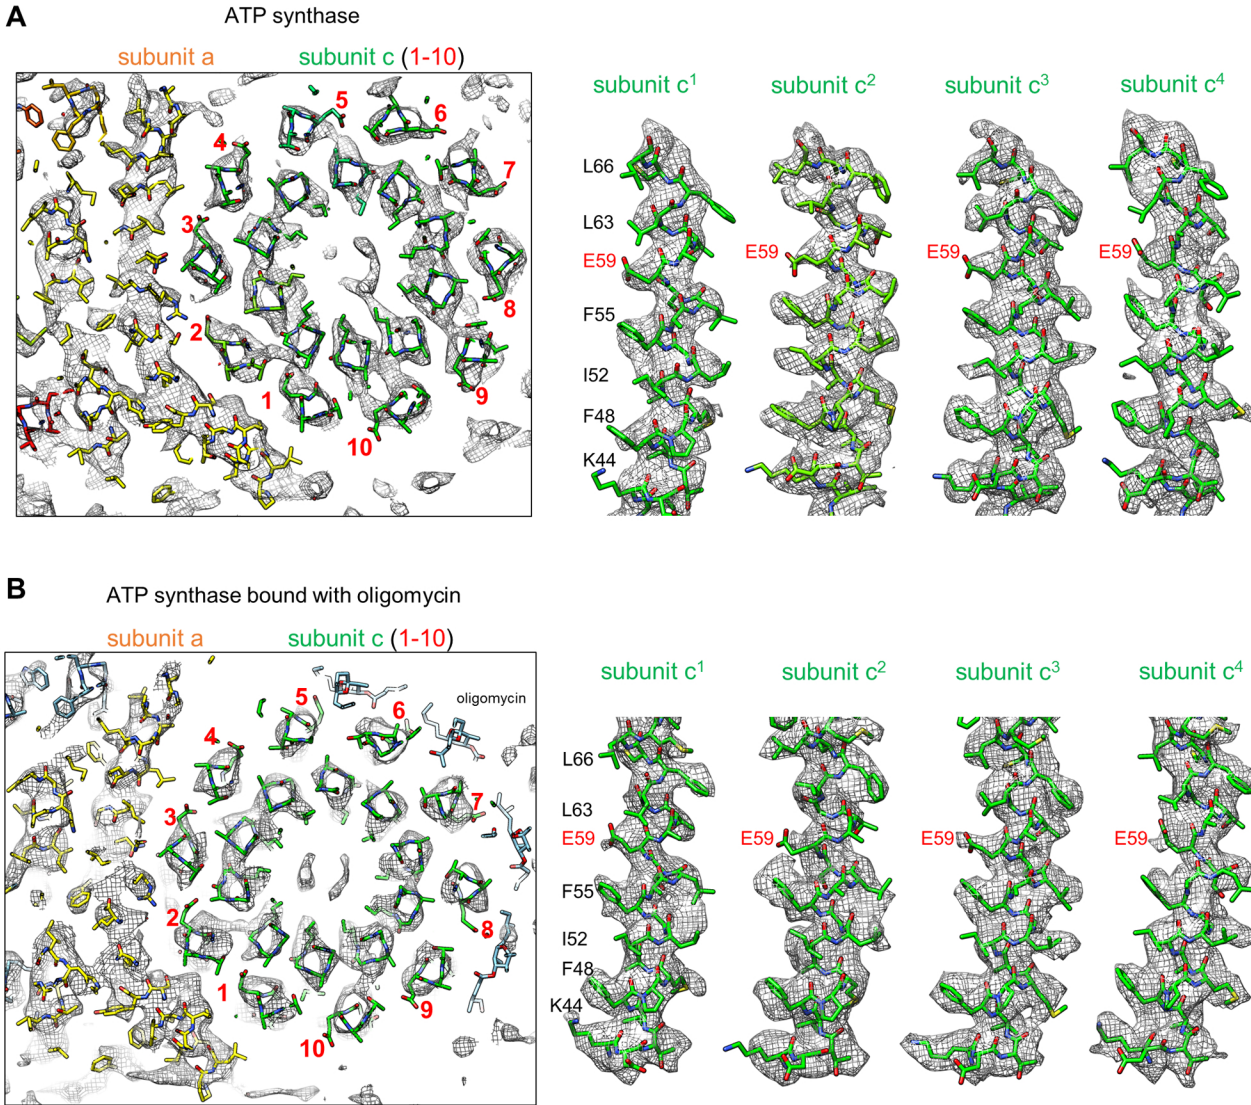



**Fig. S7. Interaction of the N-terminal residues of the  $\alpha$ -subunits with the stator.** **A.** major sites of interaction between the  $\alpha$ -subunit and the stator. Shown is an image of  $F_1F_0$  without the  $\beta$ -subunits and interacting regions of the  $\alpha$ -subunits with the stator, labeled as I-III (IV is not clearly visible from this view). The residues that are within 4Å of residue within one of the three  $\alpha$ -subunits are shown as spheres. **B.** Expanded view of A. with arrows identifying the interacting regions. **C.** Back view of A. and expanded to see region IV. Note that OSCP is at the top colored blue. Key: chains A, B, and C make  $\alpha_E$ ,  $\alpha_{TP}$ , and  $\alpha_{DP}$ , respectively.

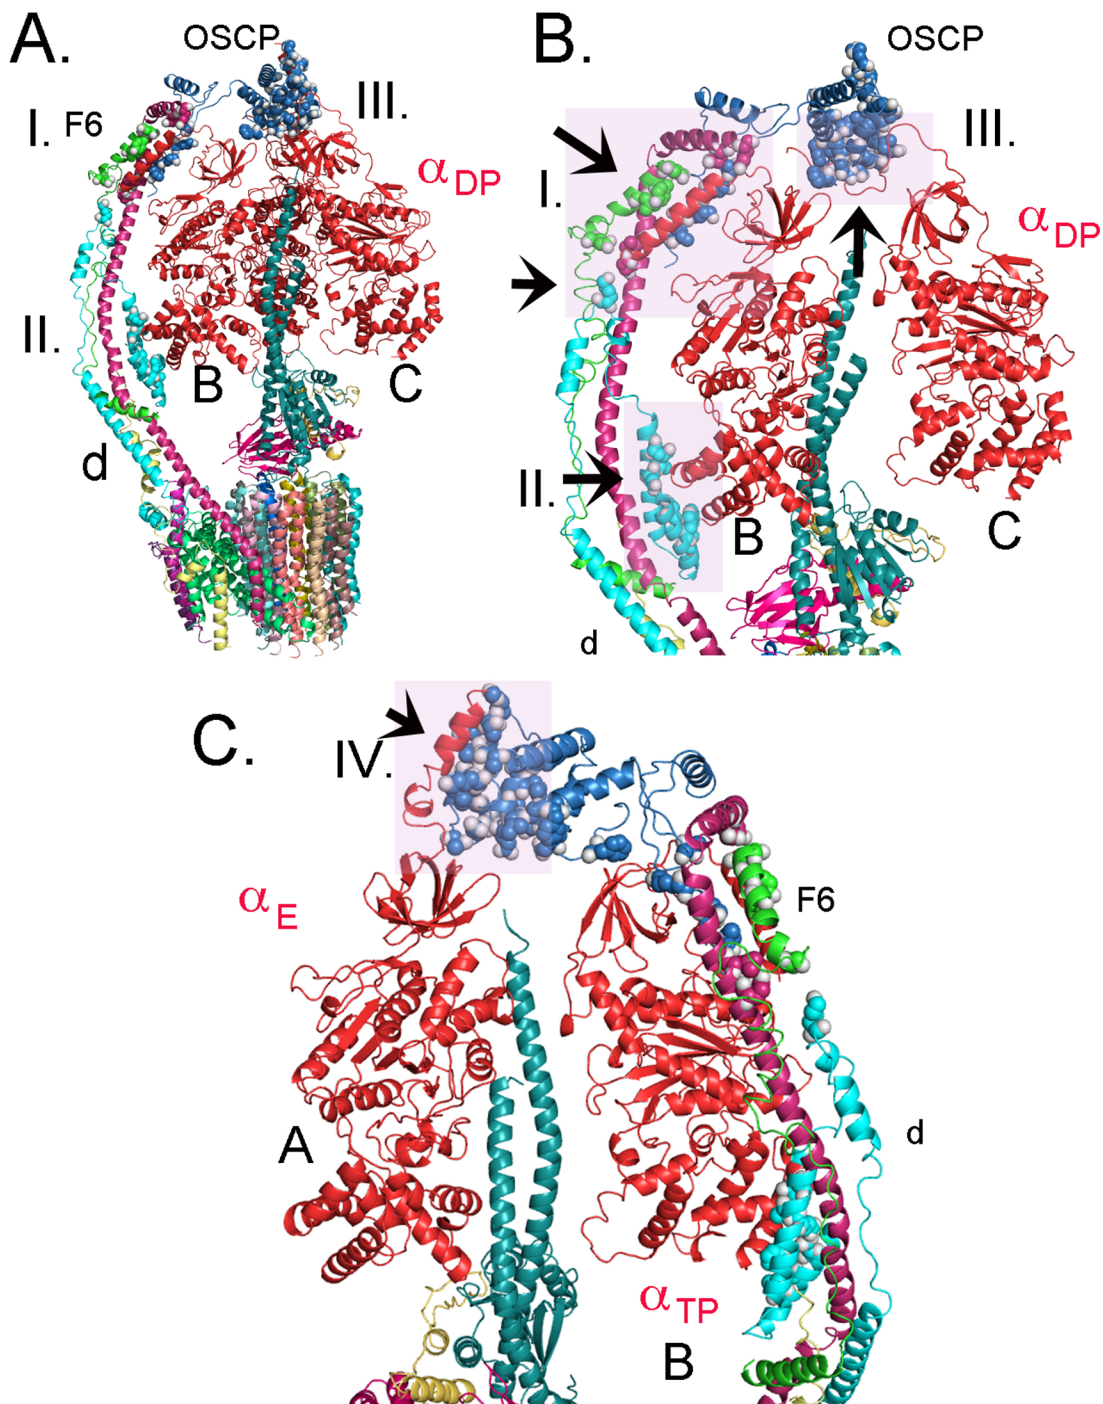

**Fig. S8. The carboxyl side chain of c-Glu59 in the open position in the membrane phase.** Shown is a top view (matrix side) of the  $c_{10}$ -ring of native  $F_1F_0$  and a-subunit (numbered 1-10, with 1 being the first subunit with interactions with a-subunit and numbered in the direction of rotation during ATP synthesis). The  $c_{10}$ -ring was superimposed with the  $c_{10}$ -ring from the crystal structure (pdb: 3U2F) where c-Glu59 is in the “open” conformation (shown in turquoise). In 4 instances (labeled as “O”;  $c^4$ ,  $c^6$ ,  $c^9$ ,  $c^{10}$ ), the carboxyl side chain of c-Glu59 (magenta) is in the open position based on the electron density here, shown at  $2\sigma$ . The inset shows an expanded side-view of  $c^6$ Glu59 with the density at  $2.6\sigma$ .

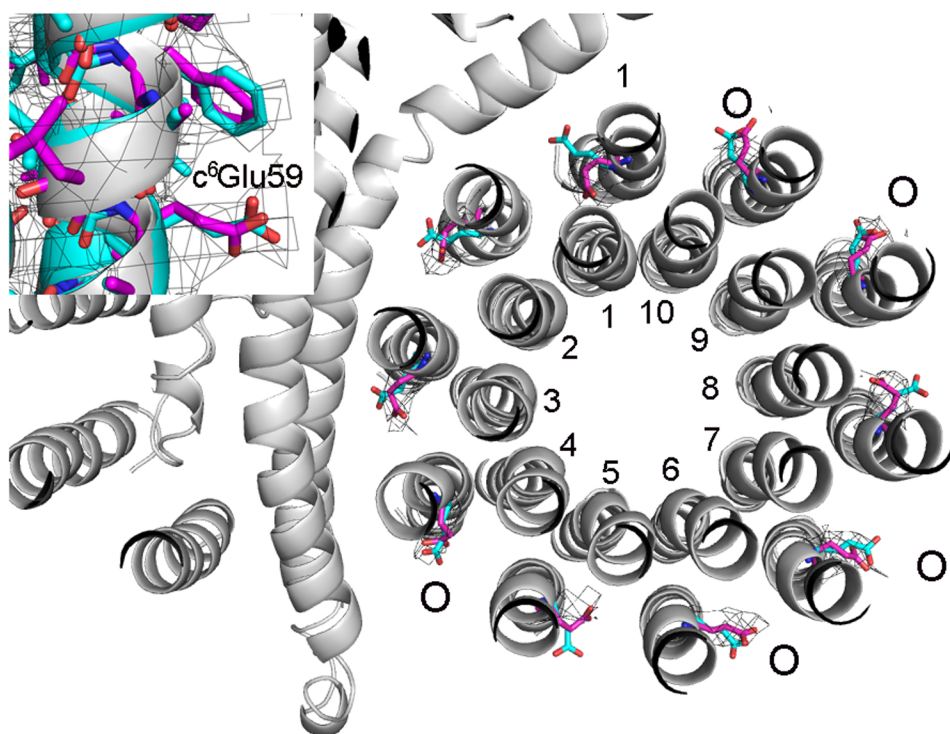

**Fig. S9. Primary sequence alignment of a-subunit.** Sequence alignment using COBALT of the primary sequence of a-subunit. The residues colored in green identify critical residues with the magenta identifying residues that are replaced or replace the critical residues.

*Saccharomyces cerevisiae* (P00854), *Mycobacterium tuberculosis* (P9WPV7), *Escherichia coli* (Q8FBS8), *Penicillium chrysogenum* (Q36918), *Drosophila melanogaster* (A0A0M4FZ99), *Homo sapiens* (P00846), *Rattus norvegicus* (P05504), *Arabidopsis thaliana* (P93298), *Zea mays* (P07925), *Chlorella variabilis* (A0A097P5W0), *Chara vulgaris* (Q7YAN7).

|               |                                                                                      |     |
|---------------|--------------------------------------------------------------------------------------|-----|
| Saccharomyces | -----                                                                                |     |
| Mycobacterium | -----                                                                                |     |
| Escherichia   | -----                                                                                |     |
| Penicillium   | -----                                                                                |     |
| Drosophila    | -----                                                                                |     |
| Homo          | -----                                                                                |     |
| Rattus        | -----                                                                                |     |
| Arabidopsis   | 1 MRRIF--LFDENSLNSSSTIDT---SSASTIDTSFASQCTNFSSGQASGTDTHAGIFEDCPGLN--FNDE RVVELQCEI   | 73  |
| Zea           | -----                                                                                |     |
| Chlorella     | -----                                                                                |     |
| Chara         | -----                                                                                |     |
|               |                                                                                      |     |
| Saccharomyces | 1 -----SPLDQFEIRTLFGLQSSF                                                            | 18  |
| Mycobacterium | 1 -----MTETILAAQIEVGEHH                                                              | 16  |
| Escherichia   | 1 -----MASENMTPODYIGHHLNQLDLRTFSLVDPHN---                                            | 33  |
| Penicillium   | 1 -----MRHL--DFVLSPLDQFEVRDLFSLNANL                                                  | 26  |
| Drosophila    | 1 -----MMTNLFSVF                                                                     | 9   |
| Homo          | 1 -----MNE--                                                                         | 3   |
| Rattus        | 1 -----MNE--                                                                         | 3   |
| Arabidopsis   | 74 REKCEALTQDPEMGLI--LGEALHAESDNVFPQSIADDLTQNGVSGEAFQEAALNIVGQAAASPLDQFEIVPLIPMH---  | 148 |
| Zea           | 1 -----MERNGEIVNNGSIIIPGGGG-----PVTESPLDQFGIHPILDLN---                               | 39  |
| Chlorella     | 1 -----MIPTPLEQFAIVLSLPIR---                                                         | 18  |
| Chara         | 1 -----MAFSPLEQFAIIPLIPIPH---                                                        | 18  |
|               |                                                                                      |     |
| Saccharomyces | 19 IDL-SCLNLTTFSLY-TIIVLLVITSLYTLTNNNNK--I-IGSRWLISQEAITYDTIMNMTKGQIGGKNW---GLY-FPMI | 89  |
| Mycobacterium | 17 TATWLGMTVNTDTVL-STAIAGLIVIALAFYLRAKVTSTDPGGVQLFFEAITIQMRNQVESAIMRIA---PFV-LPLA    | 91  |
| Escherichia   | 34 PPA-TFWTINIDSMF-FSVVLGGLFLVLFVRSVAKKATSG-VPGKFQTAIELVIGFVNGSVKDMYHGKS---KLI-APLA  | 05  |
| Penicillium   | 27 LGN-LHLSLTNIGLY-LTISIFLILTYSLLATNNNK-I-IPNNWSIQESIYATVHGI VVNQINPNKG---QMF-FPLM   | 97  |
| Drosophila    | 10 DPS-AIFNFSNLWLS-TPLGLLMIPSIYWLM-----PSRYNIMNWSILLTLHKEFKTLGLPSGH---NGS-TTIF       | 73  |
| Homo          | 4 --N-LFASFIAPTILGLPAVLIILFPPLIPTSKY--L-INNRLLITQQWLIKLTSKQMM-TMHNK---RTW-SLML       | 72  |
| Rattus        | 4 --N-LFASFITPTMMGLPIVVTIIMFPSILFPSSER--L-ISNRLHSFQHWLIKLIKQMM-LIHTPKG---RTW-ALMI    | 72  |
| Arabidopsis   | 149 IGN-FYFSFTNSSLF-MLLTLSFLLLIHFVTKKGGNL-VPNAWQSLVELLYDFVNLVKEQIGGLSGNVKQMF-FPCI    | 24  |
| Zea           | 40 IGK-YYVSFTNLSLS-MLLTGLVLLLVFVVTKGGGKS-VPNAFQSLVELIYDFVNLVNEQIGGLSGNVKHKF-FPCI     | 15  |
| Chlorella     | 19 LGN-IYLSFTNSSLY-LLSTGLVLLLFYLVTONGG-FL-VPSRWQSLVEMIEFVSLVDEQIGK----KGRFAFPLI      | 89  |
| Chara         | 19 IGN-LYLSFTNSSLF-MLLTISLVLVLLFHFVTMNGG-HL-VPNAWQSFVEMIEFVNLVNEQISGVPA-VKQRF-FPFI   | 92  |
|               |                                                                                      |     |
| +             |                                                                                      |     |
| Saccharomyces | 90 FTLFMFIFIALISLIMIPYSFA-----LSAHLVFIISLSIVIWLGNLTLGLYKHGWVFF--SLFVPAGTP            | 151 |
| Mycobacterium | 92 VTI FVVFLISWLA VLPVQYTD---KHGHTTELLKS-AAADINYLALALFVFCYHTAGIWRRGIVGH-----PIKLL    | 161 |
| Escherichia   | 106 LTI FVVVFLM LMDLLPIDLLPYIAEHVLGLPALRVVPSADVNVTLSMALGVFILILFYSIKMKIGGGFKELTLQPFNH | 185 |
| Penicillium   | 98 YVLFIFLNVNLI GLVPSYFA-----STSHFLTFSISFTVVLGATILGFRHGLKFF--SLFVPSGCP               | 159 |
| Drosophila    | 74 ISLFSLIFLNNFMGLFPYIFT-----STSHLTLSLALPLWLCFMLEYWINHTQHM--AHLVPQGT                 | 135 |
| Homo          | 73 VSLIIFATATNLLGLLPHSFT-----PTQLSMNLMAIPLWAGTVIMGFRSKIKNAL--AHLFPQGT                | 134 |
| Rattus        | 73 VSLIMFIGSTLLGLLPHFT-----PTQLSMNLMAIPLWAGAVILGFRHKLKNSL--AHLFPQGT                  | 134 |
| Arabidopsis   | 225 LVTFFLLFCNLQGMIPYSFT-----VTSHFLITLALSFSIFIGITIVGFQRHGLHFF--SFLLPAGVP             | 286 |
| Zea           | 116 SVTFFSLFRPQGMIPYSFT-----VTSHFLITLALSFSIFIGITIVGFQRHGLHFF--SFLLPAGVP              | 177 |
| Chlorella     | 90 FTTFTFLFTNLIGMIPYSFT-----ATSHLVVTFGLSLSLFIGITIVGFQVHGLHFF--SFLLPKGP               | 151 |
| Chara         | 93 FVTFTFLFCNLIGMIPYSFT-----VTSHFVVTFGLSLSLFIGITIVGFQVHGLHFF--SFLLPQGV               | 154 |
|               |                                                                                      |     |
| Saccharomyces | 152 LPLVPLLVIIITLSYFARAIISGLGLGNSILAGLLMVILAGLTF--NFMLINLFTLVFGFVPLAMI--LAIMMLFAI    | 226 |
| Mycobacterium | 162 KGHVTL LAPITLVVAKPISLSLDFGNIFAGGILVALIALFPP-----YIMWAPNAIWKAFILFV                | 223 |
| Escherichia   | 186 WAFIPVNLILGVSLSKVPVSLGLDFGNMYAGLIFILIAGLLPWWSQWILN-----VPWAIFILI                 | 248 |
| Penicillium   | 160 LALLPLLVLIEFISYLSRNVSGLGLAANILSGMLLSILSGFTY--NIMTSGIIFFILGLIPLAPI--IAFSGLFAI     | 234 |
| Drosophila    | 136 AILMPFMVCIETISNIIRPGTLAVLNTANMIAGLLTLGNTG--PSMSYM-----LVTFLMAQIALLVLSAV          | 204 |
| Homo          | 135 TPLIFMLVIIETISLLIQPMALAVLNTANITAGLLMHLIGSAT---LAMSTINL-PSTLIIFTIL--ILLTILIAV     | 206 |
| Rattus        | 135 ISLIPMLIIETISLFIQPMALAVLNTANITAGLLMHLIGSAT---LVLMDISP-PTATITIFIL--LLTGLFAV       | 206 |
| Arabidopsis   | 287 LPLAPFVLVLELISYCFRALSLGILFANMMAGSSLVKILSGFA--WTMLCMNDIFYFIGALGPLFIV--LALTGLLVG   | 362 |
| Zea           | 178 LPLAPFVLVLELISHCFRALSSGILFANMMAGSSSVKILSGFA--WTMLFLNIFYFLGDLGPLFIV--LALTGLLVG    | 253 |
| Chlorella     | 152 LLLAPLVLVLELVSYCFRAVSLGILFANMMAGTFLVKILSGFA--WTMLSVGGVLA-AASVIPPFAIV--FALTGLLVG  | 226 |
| Chara         | 155 LPLAPFVLVLELISYCFRALSLGILFANMMAGSSLVKILSGFA--WTMLSMGGIMY-LAHLAPFLIV--FALTGLLVG   | 229 |
|               |                                                                                      |     |
| Saccharomyces | 227 GIIGYVWAILTASYLKDAVYLH-----                                                      | 249 |
| Mycobacterium | 224 GAIGAFIFALLTILYFSQAMELEEEHH-----                                                 | 250 |
| Escherichia   | 249 ITLQAFIFMVLTIIVYLSMASEEH-----                                                    | 271 |
| Penicillium   | 235 AFIDAQVFFVLACS YIKDGLDLH-----                                                    | 257 |
| Drosophila    | 205 AMICSYVFAVLSLTSYSSEVN-----                                                       | 224 |
| Homo          | 207 ALICAYVFTLLVSLYLHDNT-----                                                        | 226 |
| Rattus        | 207 ALICAYVFTLLVSLYLHDNT-----                                                        | 226 |
| Arabidopsis   | 363 AILCAYVFTILICIVLNDAINLH-----                                                     | 385 |
| Zea           | 254 AISCAHVSTISICIVLNDATNLHQNESFHNCIKTRSQS                                           | 291 |
| Chlorella     | 227 ACLCAYVFTILTICIVLNDAINLH-----                                                    | 249 |
| Chara         | 230 AVLICAYVFTILICIVLNDAINLH-----                                                    | 252 |

**Fig. S10. Rotational states of the  $c_{10}$ -ring.** The  $c_{10}$ -ring was rotated along the z-axis in steps of 9 (yellow), 18 (green) and 27° (blue) relative to the initial state (grey). **A. Top view of the  $c_{10}$ -ring in all rotation positions with a-subunit (purple) and the subunits b and f (blue).** **B. Side view of A.** **C. Position of  $c^1$ Glu59 after rotation of the  $c_{10}$ -ring by 9°.** The rotomer of Glu59 is that as observed in  $c^{10}$ Glu59, as that is expected to be the conformation as  $c^{10}$ Glu59 enters  $c^1$ Glu59 space. **D. Position of  $c^2$ Glu59 after rotation of the  $c_{10}$ -ring by 27°.** The position of Glu59 after rotation of the  $c_{10}$ -ring by 27° places the side chain, depending on the rotomer, within 3Å of aAsn180 and 9Å of aGlu223. The distance between Glu59 and aGlu223 is certainly too far for eliciting changes in the chemistry of Glu59, without bridging water molecules or without other conformational changes that might occur during the reaction cycle.

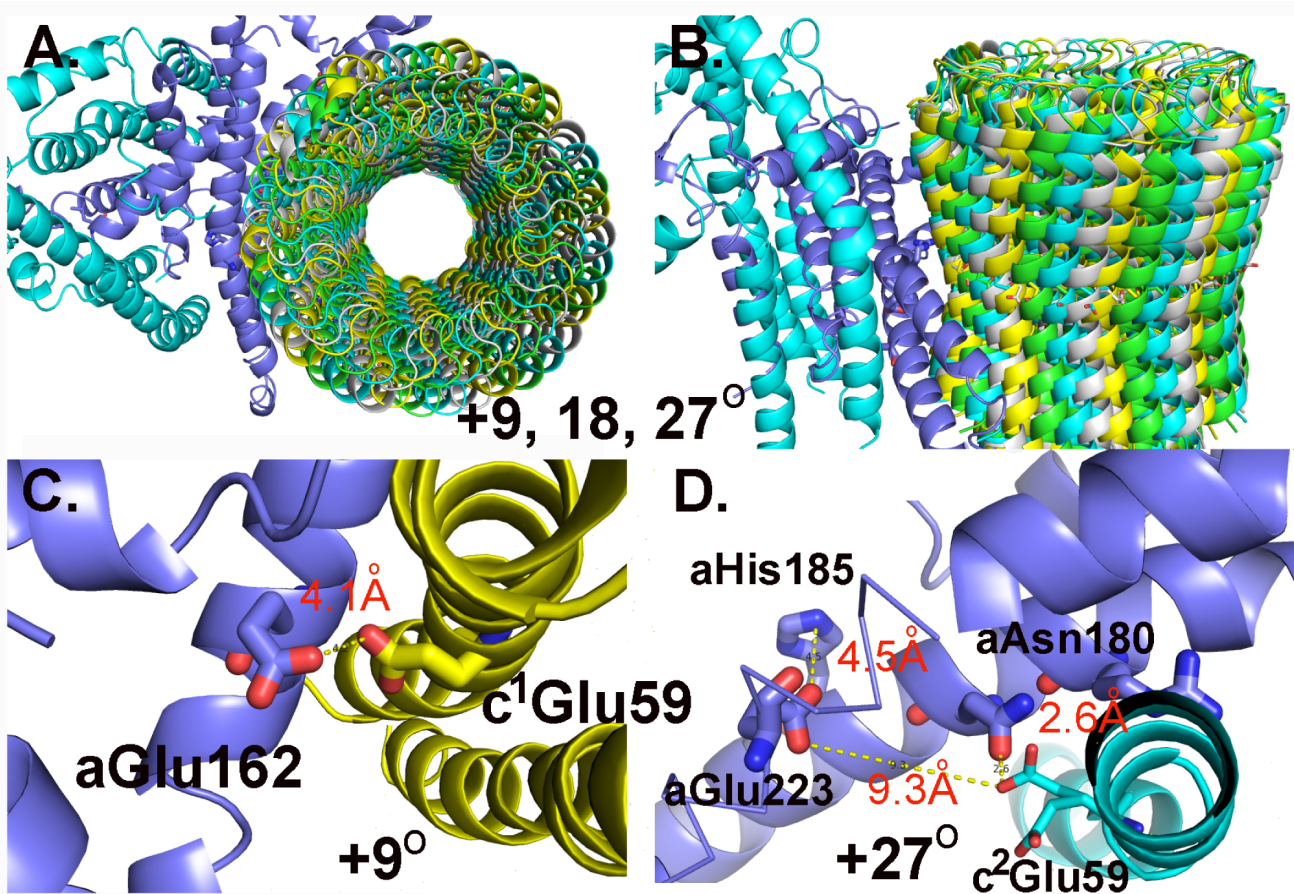

**Fig. S11. Structure of “Oligomycin 5” binding site. A. Possible alternate binding mode on the surface of the  $c^4c^5$ .** Shown in the model of “Oligo5” (turquoise) and oligomycin in the standard conformation and binding mode (black). Note cGlu59 does not make any interaction with “Oligo5” and the isopropyl group off C2 is in a much different position. Of the residues on subunit a, only aPro212 is within  $4\text{\AA}$  of the Oligo5 (not shown). **B. The cryo-EM density corresponding to “Oligo5”.** The cryo-EM density at  $5.5\sigma$  (red) and  $4.5\sigma$  (black). **C. The cryo-EM density corresponding to Oligo4.** The cryo-EM density at  $5.5\sigma$  (red) and  $4.5\sigma$  (black).

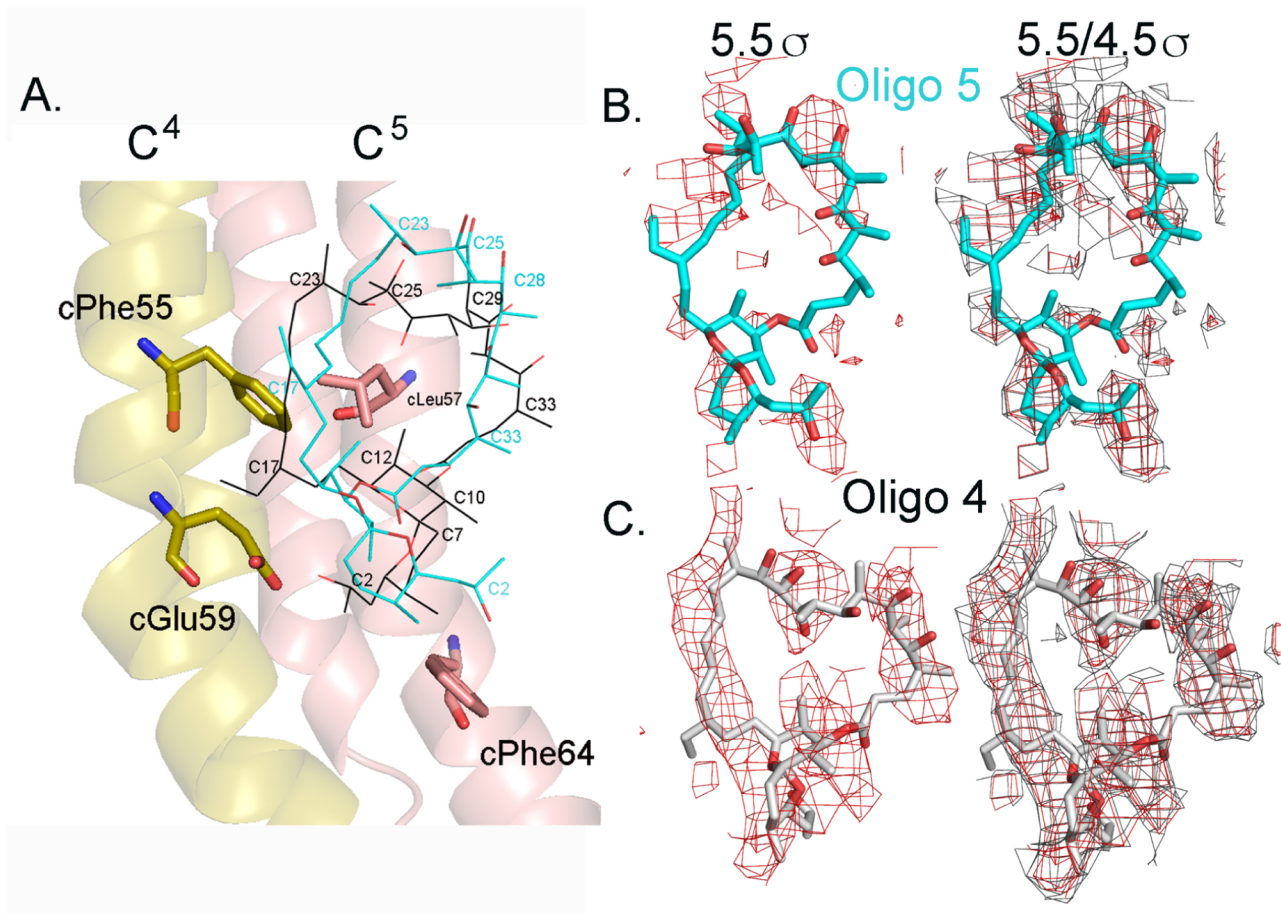

**Fig. S12. Molecular dynamics simulations of the  $c_{10}$ -ring inhibitor complex in a lipid membrane.** **A.** View of the molecular system along the plane of the membrane. In addition to the  $c_{10}$ -ring (grey) and the four oligomycin molecules bound (red/magenta/white spheres), the system comprises 227 phospholipid molecules (blue/red/cyan sticks), 17503 water molecules (small red spheres), and 21 mobile ions that neutralize the net charge of the system (orange spheres). The system is approximately  $10 \times 10 \times 10\text{nm}^3$ , for a total of about 95,000 atoms. **B.** Same as (A), viewed from matrix side. Note the interior of the  $c_{10}$ -ring is filled with lipid. **C.** Close-up view of oligomycin in the dissociated state.

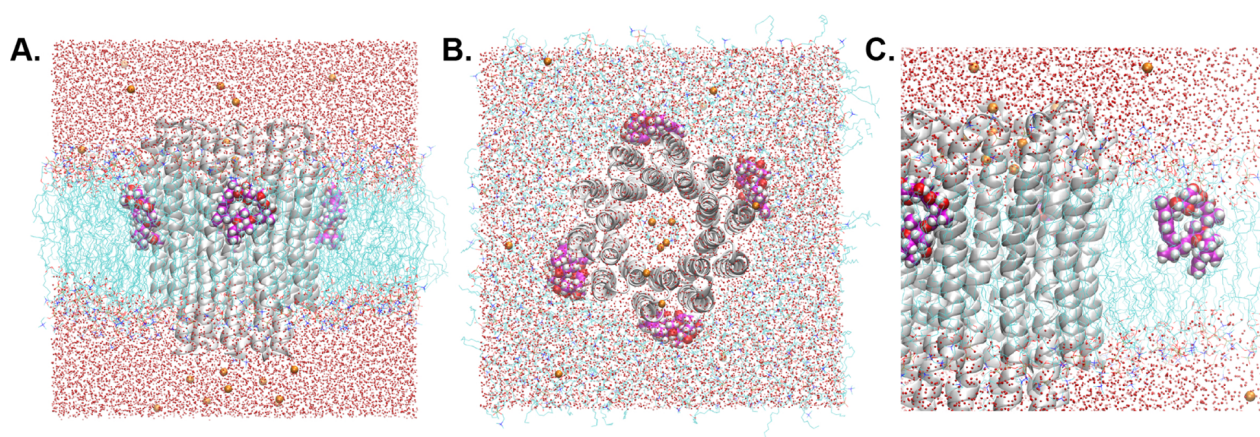

## References

1. T. Xu, V. Pagadala, D. M. Mueller, Understanding structure, function, and mutations in the mitochondrial ATP synthase. *Microb. Cell* **2**, 105–125 (2015). [doi:10.15698/mic2015.04.197](https://doi.org/10.15698/mic2015.04.197) [Medline](#)
2. I. Arnold, K. Pfeiffer, W. Neupert, R. A. Stuart, H. Schagger, Yeast mitochondrial F<sub>1</sub>F<sub>0</sub>-ATP synthase exists as a dimer: Identification of three dimer-specific subunits. *EMBO J.* **17**, 7170–7178 (1998). [doi:10.1093/emboj/17.24.7170](https://doi.org/10.1093/emboj/17.24.7170) [Medline](#)
3. B. Daum, D. Nicastro, J. Austin II, J. R. McIntosh, W. Kühlbrandt, Arrangement of photosystem II and ATP synthase in chloroplast membranes of spinach and pea. *Plant Cell* **22**, 1299–1312 (2010). [doi:10.1105/tpc.109.071431](https://doi.org/10.1105/tpc.109.071431) [Medline](#)
4. L. A. Baker, I. N. Watt, M. J. Runswick, J. E. Walker, J. L. Rubinstein, Arrangement of subunits in intact mammalian mitochondrial ATP synthase determined by cryo-EM. *Proc. Natl. Acad. Sci. U.S.A.* **109**, 11675–11680 (2012). [doi:10.1073/pnas.1204935109](https://doi.org/10.1073/pnas.1204935109) [Medline](#)
5. I. G. Denisov, Y. V. Grinkova, A. A. Lazarides, S. G. Sligar, Directed self-assembly of monodisperse phospholipid bilayer nanodiscs with controlled size. *J. Am. Chem. Soc.* **126**, 3477–3487 (2004). [doi:10.1021/ja0393574](https://doi.org/10.1021/ja0393574) [Medline](#)
6. J. P. Abrahams, A. G. W. Leslie, R. Lutter, J. E. Walker, Structure at 2.8 Å resolution of F<sub>1</sub>-ATPase from bovine heart mitochondria. *Nature* **370**, 621–628 (1994). [doi:10.1038/370621a0](https://doi.org/10.1038/370621a0) [Medline](#)
7. V. Kabaleeswaran, N. Puri, J. E. Walker, A. G. Leslie, D. M. Mueller, Novel features of the rotary catalytic mechanism revealed in the structure of yeast F<sub>1</sub> ATPase. *EMBO J.* **25**, 5433–5442 (2006). [doi:10.1038/sj.emboj.7601410](https://doi.org/10.1038/sj.emboj.7601410) [Medline](#)
8. A. Dautant, J. Velours, M. F. Giraud, Crystal structure of the Mg·ADP-inhibited state of the yeast F<sub>1</sub>C<sub>10</sub>-ATP synthase. *J. Biol. Chem.* **285**, 29502–29510 (2010). [doi:10.1074/jbc.M110.124529](https://doi.org/10.1074/jbc.M110.124529) [Medline](#)
9. D. Stock, A. G. W. Leslie, J. E. Walker, Molecular architecture of the rotary motor in ATP synthase. *Science* **286**, 1700–1705 (1999). [doi:10.1126/science.286.5445.1700](https://doi.org/10.1126/science.286.5445.1700) [Medline](#)
10. V. K. Dickson, J. A. Silvester, I. M. Fearnley, A. G. Leslie, J. E. Walker, On the structure of the stator of the mitochondrial ATP synthase. *EMBO J.* **25**, 2911–2918 (2006). [doi:10.1038/sj.emboj.7601177](https://doi.org/10.1038/sj.emboj.7601177) [Medline](#)
11. H. Guo, S. A. Bueler, J. L. Rubinstein, Atomic model for the dimeric F<sub>o</sub> region of mitochondrial ATP synthase. *Science* **358**, 936–940 (2017). [doi:10.1126/science.aao4815](https://doi.org/10.1126/science.aao4815) [Medline](#)
12. K. R. Vinothkumar, M. G. Montgomery, S. Liu, J. E. Walker, Structure of the mitochondrial ATP synthase from *Pichia angusta* determined by electron cryo-microscopy. *Proc. Natl. Acad. Sci. U.S.A.* **113**, 12709–12714 (2016). [doi:10.1073/pnas.1615902113](https://doi.org/10.1073/pnas.1615902113) [Medline](#)

13. S. B. Vik, J. C. Long, T. Wada, D. Zhang, A model for the structure of subunit a of the *Escherichia coli* ATP synthase and its role in proton translocation. *Biochim. Biophys. Acta* **1458**, 457–466 (2000). [doi:10.1016/S0005-2728\(00\)00094-3](https://doi.org/10.1016/S0005-2728(00)00094-3) [Medline](#)
14. S. B. Vik, B. J. Antonio, A mechanism of proton translocation by F<sub>1</sub>F<sub>0</sub> ATP synthases suggested by double mutants of the a subunit. *J. Biol. Chem.* **269**, 30364–30369 (1994). [Medline](#)
15. W. Junge, H. Lill, S. Engelbrecht, ATP synthase: An electrochemical transducer with rotatory mechanics. *Trends Biochem. Sci.* **22**, 420–423 (1997). [doi:10.1016/S0968-0004\(97\)01129-8](https://doi.org/10.1016/S0968-0004(97)01129-8) [Medline](#)
16. J. Symersky, V. Pagadala, D. Osowski, A. Krah, T. Meier, J. D. Faraldo-Gómez, D. M. Mueller, Structure of the c<sub>10</sub> ring of the yeast mitochondrial ATP synthase in the open conformation. *Nat. Struct. Mol. Biol.* **19**, 485–491, S1 (2012). [doi:10.1038/nsmb.2284](https://doi.org/10.1038/nsmb.2284) [Medline](#)
17. D. Pogoryelov, O. Yildiz, J. D. Faraldo-Gómez, T. Meier, High-resolution structure of the rotor ring of a proton-dependent ATP synthase. *Nat. Struct. Mol. Biol.* **16**, 1068–1073 (2009). [doi:10.1038/nsmb.1678](https://doi.org/10.1038/nsmb.1678) [Medline](#)
18. N. Mitome, S. Ono, H. Sato, T. Suzuki, N. Sone, M. Yoshida, Essential arginine residue of the F<sub>o</sub>-I subunit in F<sub>o</sub>F<sub>1</sub>-ATP synthase has a role to prevent the proton shortcut without c-ring rotation in the F<sub>o</sub> proton channel. *Biochem. J.* **430**, 171–177 (2010). [doi:10.1042/BJ20100621](https://doi.org/10.1042/BJ20100621) [Medline](#)
19. N. Klusch, B. J. Murphy, D. J. Mills, Ö. Yildiz, W. Kühlbrandt, Structural basis of proton translocation and force generation in mitochondrial ATP synthase. *eLife* **6**, e33274 (2017). [doi:10.7554/eLife.33274](https://doi.org/10.7554/eLife.33274) [Medline](#)
20. M. Allegretti, N. Klusch, D. J. Mills, J. Vonck, W. Kühlbrandt, K. M. Davies, Horizontal membrane-intrinsic  $\alpha$ -helices in the stator a-subunit of an F-type ATP synthase. *Nature* **521**, 237–240 (2015). [doi:10.1038/nature14185](https://doi.org/10.1038/nature14185) [Medline](#)
21. V. Leone, J. D. Faraldo-Gómez, Structure and mechanism of the ATP synthase membrane motor inferred from quantitative integrative modeling. *J. Gen. Physiol.* **148**, 441–457 (2016). [doi:10.1085/jgp.201611679](https://doi.org/10.1085/jgp.201611679) [Medline](#)
22. F. M. Assadi-Porter, R. H. Fillingame, Proton-translocating carboxyl of subunit c of F<sub>1</sub>F<sub>o</sub> H<sup>+</sup>-ATP synthase: The unique environment suggested by the pK<sub>a</sub> determined by <sup>1</sup>H NMR. *Biochemistry* **34**, 16186–16193 (1995). [doi:10.1021/bi00049a034](https://doi.org/10.1021/bi00049a034) [Medline](#)
23. M. J. Root, R. MacKinnon, Two identical noninteracting sites in an ion channel revealed by proton transfer. *Science* **265**, 1852–1856 (1994). [doi:10.1126/science.7522344](https://doi.org/10.1126/science.7522344) [Medline](#)
24. J. A. Morrill, R. MacKinnon, Isolation of a single carboxyl-carboxylate proton binding site in the pore of a cyclic nucleotide-gated channel. *J. Gen. Physiol.* **114**, 71–84 (1999). [doi:10.1085/jgp.114.1.71](https://doi.org/10.1085/jgp.114.1.71) [Medline](#)



25. T. K. Harris, G. J. Turner, Structural basis of perturbed  $pK_a$  values of catalytic groups in enzyme active sites. *IUBMB Life* **53**, 85–98 (2002). [doi:10.1080/15216540211468](https://doi.org/10.1080/15216540211468) [Medline](#)
26. R. E. Koeppe II, R. M. Stroud, Mechanism of hydrolysis by serine proteases: Direct determination of the  $pK_a$ 's of aspartyl-102 and aspartyl-194 in bovine trypsin using difference infrared spectroscopy. *Biochemistry* **15**, 3450–3458 (1976). [doi:10.1021/bi00661a009](https://doi.org/10.1021/bi00661a009) [Medline](#)
27. F. I. Valiyaveetil, R. H. Fillingame, On the role of Arg-210 and Glu-219 of subunit a in proton translocation by the *Escherichia coli*  $F_0F_1$ -ATP synthase. *J. Biol. Chem.* **272**, 32635–32641 (1997). [doi:10.1074/jbc.272.51.32635](https://doi.org/10.1074/jbc.272.51.32635) [Medline](#)
28. F. I. Valiyaveetil, R. H. Fillingame, Transmembrane topography of subunit a in the *Escherichia coli*  $F_1F_0$  ATP synthase. *J. Biol. Chem.* **273**, 16241–16247 (1998). [doi:10.1074/jbc.273.26.16241](https://doi.org/10.1074/jbc.273.26.16241) [Medline](#)
29. J. Symersky, D. Osowski, D. E. Walters, D. M. Mueller, Oligomycin frames a common drug-binding site in the ATP synthase. *Proc. Natl. Acad. Sci. U.S.A.* **109**, 13961–13965 (2012). [doi:10.1073/pnas.1207912109](https://doi.org/10.1073/pnas.1207912109) [Medline](#)
30. U. P. John, P. Nagley, Amino acid substitutions in mitochondrial ATPase subunit 6 of *Saccharomyces cerevisiae* leading to oligomycin resistance. *FEBS Lett.* **207**, 79–83 (1986). [doi:10.1016/0014-5793\(86\)80016-3](https://doi.org/10.1016/0014-5793(86)80016-3) [Medline](#)
31. I. G. Denisov, B. J. Baas, Y. V. Grinkova, S. G. Sligar, Cooperativity in cytochrome P450 3A4: Linkages in substrate binding, spin state, uncoupling, and product formation. *J. Biol. Chem.* **282**, 7066–7076 (2007). [doi:10.1074/jbc.M609589200](https://doi.org/10.1074/jbc.M609589200) [Medline](#)
32. R. B. Kapust, J. Tözsér, J. D. Fox, D. E. Anderson, S. Cherry, T. D. Copeland, D. S. Waugh, Tobacco etch virus protease: Mechanism of autolysis and rational design of stable mutants with wild-type catalytic proficiency. *Protein Eng.* **14**, 993–1000 (2001). [doi:10.1093/protein/14.12.993](https://doi.org/10.1093/protein/14.12.993) [Medline](#)
33. V. Pagadala, L. Vistain, J. Symersky, D. M. Mueller, Characterization of the mitochondrial ATP synthase from yeast *Saccharomyces cerevisiae*. *J. Bioenerg. Biomembr.* **43**, 333–347 (2011). [doi:10.1007/s10863-011-9364-5](https://doi.org/10.1007/s10863-011-9364-5) [Medline](#)
34. U. Güldener, S. Heck, T. Fielder, J. Beinhauer, J. H. Hegemann, A new efficient gene disruption cassette for repeated use in budding yeast. *Nucleic Acids Res.* **24**, 2519–2524 (1996). [doi:10.1093/nar/24.13.2519](https://doi.org/10.1093/nar/24.13.2519) [Medline](#)
35. N. Puri, J. Lai-Zhang, S. Meier, D. M. Mueller, Expression of bovine  $F_1$ -ATPase with functional complementation in yeast *Saccharomyces cerevisiae*. *J. Biol. Chem.* **280**, 22418–22424 (2005). [doi:10.1074/jbc.M411113200](https://doi.org/10.1074/jbc.M411113200) [Medline](#)
36. R. S. Sikorski, P. Hieter, A system of shuttle vectors and yeast host strains designed for efficient manipulation of DNA in *Saccharomyces cerevisiae*. *Genetics* **122**, 19–27 (1989). [Medline](#)

37. R. D. Gietz, R. A. Woods, Transformation of yeast by lithium acetate/single-stranded carrier DNA/polyethylene glycol method. *Methods Enzymol.* **350**, 87–96 (2002). [doi:10.1016/S0076-6879\(02\)50957-5](https://doi.org/10.1016/S0076-6879(02)50957-5) [Medline](#)
38. T. K. Ritchie, Y. V. Grinkova, T. H. Bayburt, I. G. Denisov, J. K. Zolnerciks, W. M. Atkins, S. G. Sligar, Chapter Eleven - Reconstitution of membrane proteins in phospholipid bilayer nanodiscs. *Methods Enzymol.* **464**, 211–231 (2009). [doi:10.1016/S0076-6879\(09\)64011-8](https://doi.org/10.1016/S0076-6879(09)64011-8) [Medline](#)
39. H. S. Penefsky, A centrifuged-column procedure for the measurement of ligand binding by beef heart F<sub>1</sub>. *Methods Enzymol.* **56**, 527–530 (1979). [doi:10.1016/0076-6879\(79\)56050-9](https://doi.org/10.1016/0076-6879(79)56050-9) [Medline](#)
40. X. Li, S. Zheng, D. A. Agard, Y. Cheng, Asynchronous data acquisition and on-the-fly analysis of dose fractionated cryoEM images by UCSFImage. *J. Struct. Biol.* **192**, 174–178 (2015). [doi:10.1016/j.jsb.2015.09.003](https://doi.org/10.1016/j.jsb.2015.09.003) [Medline](#)
41. W. Mi, Y. Li, S. H. Yoon, R. K. Ernst, T. Walz, M. Liao, Structural basis of MsbA-mediated lipopolysaccharide transport. *Nature* **549**, 233–237 (2017). [doi:10.1038/nature23649](https://doi.org/10.1038/nature23649) [Medline](#)
42. S. Q. Zheng, E. Palovcak, J.-P. Armache, K. A. Verba, Y. Cheng, D. A. Agard, MotionCor2: Anisotropic correction of beam-induced motion for improved cryo-electron microscopy. *Nat. Methods* **14**, 331–332 (2017). [doi:10.1038/nmeth.4193](https://doi.org/10.1038/nmeth.4193) [Medline](#)
43. A. Rohou, N. Grigorieff, CTFFIND4: Fast and accurate defocus estimation from electron micrographs. *J. Struct. Biol.* **192**, 216–221 (2015). [doi:10.1016/j.jsb.2015.08.008](https://doi.org/10.1016/j.jsb.2015.08.008) [Medline](#)
44. H. Ru, M. G. Chambers, T.-M. Fu, A. B. Tong, M. Liao, H. Wu, Molecular mechanism of V(D)J recombination from synaptic RAG1-RAG2 complex structures. *Cell* **163**, 1138–1152 (2015). [doi:10.1016/j.cell.2015.10.055](https://doi.org/10.1016/j.cell.2015.10.055) [Medline](#)
45. S. H. Scheres, RELION: Implementation of a Bayesian approach to cryo-EM structure determination. *J. Struct. Biol.* **180**, 519–530 (2012). [doi:10.1016/j.jsb.2012.09.006](https://doi.org/10.1016/j.jsb.2012.09.006) [Medline](#)
46. X. C. Bai, E. Rajendra, G. Yang, Y. Shi, S. H. Scheres, Sampling the conformational space of the catalytic subunit of human  $\gamma$ -secretase. *eLife* **4**, e11182 (2015). [doi:10.7554/eLife.11182](https://doi.org/10.7554/eLife.11182) [Medline](#)
47. P. Emsley, K. Cowtan, Coot: Model-building tools for molecular graphics. *Acta Crystallogr. D Biol. Crystallogr.* **60**, 2126–2132 (2004). [doi:10.1107/S0907444904019158](https://doi.org/10.1107/S0907444904019158) [Medline](#)
48. G. N. Murshudov, P. Skubák, A. A. Lebedev, N. S. Pannu, R. A. Steiner, R. A. Nicholls, M. D. Winn, F. Long, A. A. Vagin, REFMAC5 for the refinement of macromolecular crystal structures. *Acta Crystallogr. D Biol. Crystallogr.* **67**, 355–367 (2011). [doi:10.1107/S0907444911001314](https://doi.org/10.1107/S0907444911001314) [Medline](#)
49. P. D. Adams, P. V. Afonine, G. Bunkóczi, V. B. Chen, I. W. Davis, N. Echols, J. J. Headd, L.-W. Hung, G. J. Kapral, R. W. Grosse-Kunstleve, A. J. McCoy, N. W.

- Moriarty, R. Oeffner, R. J. Read, D. C. Richardson, J. S. Richardson, T. C. Terwilliger, P. H. Zwart, PHENIX: A comprehensive Python-based system for macromolecular structure solution. *Acta Crystallogr. D Biol. Crystallogr.* **66**, 213–221 (2010). [doi:10.1107/S0907444909052925](https://doi.org/10.1107/S0907444909052925) [Medline](#)
50. B. A. Barad, N. Echols, R. Y.-R. Wang, Y. Cheng, F. DiMaio, P. D. Adams, J. S. Fraser, EMRinger: Side chain-directed model and map validation for 3D cryo-electron microscopy. *Nat. Methods* **12**, 943–946 (2015). [doi:10.1038/nmeth.3541](https://doi.org/10.1038/nmeth.3541) [Medline](#)
51. V. B. Chen, W. B. Arendall III, J. J. Headd, D. A. Keedy, R. M. Immormino, G. J. Kapral, L. W. Murray, J. S. Richardson, D. C. Richardson, MolProbity: All-atom structure validation for macromolecular crystallography. *Acta Crystallogr. D Biol. Crystallogr.* **66**, 12–21 (2010). [doi:10.1107/S0907444909042073](https://doi.org/10.1107/S0907444909042073) [Medline](#)
52. J. C. Phillips, R. Braun, W. Wang, J. Gumbart, E. Tajkhorshid, E. Villa, C. Chipot, R. D. Skeel, L. Kalé, K. Schulten, Scalable molecular dynamics with NAMD. *J. Comput. Chem.* **26**, 1781–1802 (2005). [doi:10.1002/jcc.20289](https://doi.org/10.1002/jcc.20289) [Medline](#)
53. R. B. Best, X. Zhu, J. Shim, P. E. M. Lopes, J. Mittal, M. Feig, A. D. Mackerell Jr., Optimization of the additive CHARMM all-atom protein force field targeting improved sampling of the backbone  $\phi$ ,  $\psi$  and side-chain  $\chi_1$  and  $\chi_2$  dihedral angles. *J. Chem. Theory Comput.* **8**, 3257–3273 (2012). [doi:10.1021/ct300400x](https://doi.org/10.1021/ct300400x) [Medline](#)
54. J. B. Klauda, R. M. Venable, J. A. Freites, J. W. O'Connor, D. J. Tobias, C. Mondragon-Ramirez, I. Vorobyov, A. D. MacKerell Jr., R. W. Pastor, Update of the CHARMM all-atom additive force field for lipids: Validation on six lipid types. *J. Phys. Chem. B* **114**, 7830–7843 (2010). [doi:10.1021/jp101759q](https://doi.org/10.1021/jp101759q) [Medline](#)
55. L. Huang, B. Roux, Automated force field parameterization for non-polarizable and polarizable atomic models based on ab initio target data. *J. Chem. Theory Comput.* **9**, 3543–3556 (2013). [doi:10.1021/ct4003477](https://doi.org/10.1021/ct4003477) [Medline](#)
56. R. Staritzbichler, C. Anselmi, L. R. Forrest, J. D. Faraldo-Gómez, GRIFFIN: A versatile methodology for optimization of protein-lipid interfaces for membrane protein simulations. *J. Chem. Theory Comput.* **7**, 1167–1176 (2011). [doi:10.1021/ct100576m](https://doi.org/10.1021/ct100576m) [Medline](#)
57. W. Zhou, V. Leone, A. Krah, J. D. Faraldo-Gómez, Predicted structures of the proton-bound membrane-embedded rotor rings of the *Saccharomyces cerevisiae* and *Escherichia coli* ATP synthases. *J. Phys. Chem. B* **121**, 3297–3307 (2017). [doi:10.1021/acs.jpcc.6b08051](https://doi.org/10.1021/acs.jpcc.6b08051) [Medline](#)
58. J. S. Papadopoulos, R. Agarwala, COBALT: Constraint-based alignment tool for multiple protein sequences. *Bioinformatics* **23**, 1073–1079 (2007). [doi:10.1093/bioinformatics/btm076](https://doi.org/10.1093/bioinformatics/btm076) [Medline](#)
59. The PyMOL Molecular Graphics System, version 2.0, Schrödinger, LLC.
